# Supplementary material for: Statistical Evaluation of the Level of Development of Circular Economy in European Union Member Countries
Source: Preprints.org preprint supplement (doi:10.20944/preprints202011.0359.v1), 2020-11-12
Supplement: Supplementary file 2 [file supplementary]

## Sheet: Indicators
	Cyrcular economy
		X1	X2	X3	X4	X5	X6	X7	X8	X9	X10	X11	X12	X13	X14	X15	X16	X17
	Belgium	456	108	24	54.9	71	79.8	41.5	63.3	30.4	97	17	12.6	15.9446	349.877	616.812	262.698	1.13
	Bulgaria	554	387	12.3	24.5	27	61.6	40.9	53.8	40.8	0	62	2.1	7.33787	108.016	35.8481	29.8285	0.18
	Czechia	318	79	7.4	15.8	50	70	54	36.3	22.7	7	91	5.3	0.167205	7.2149	59.7928	238.826	0.8
	Denmark	762	44	9.1	42.1	56	84	26.4	86.1	41	130	91	8	13.7158	103.459	57.2066	430.51	0.18
	Germany	602	54	11.1	62.5	55	72.7	45.1	27.5	37.8	101	95	11	13.9065	49.9695	123.397	146.275	0.97
	Estonia	305	779	34.4	18.2	22	56.1	33.4	63	30.3	24	96	8.8	13.8463	257.799	14.6582	244.47	0.22
	Ireland	624	74	11.7	35.7	36	66.2	39.4	83.2	30.9	23	97	1.7	0.845203	72.7612	21.6527	134.906	0.41
	Greece	532	99	12.7	17.1	18	58.7	30.1	50.1	19.4	13	0	2.7	32.9309	33.3154	61.5722	10.1178	0.09
	Spain	510	57	10.5	29.2	44	61.9	29.2	55.7	14.7	59	65	10.4	15.4434	18.0596	139.563	11.8011	0.26
	France	534	49	12.4	36	50	61.1	23.7	19.1	21.8	85	66	17.5	4.4574	25.0919	56.3488	144.109	0.8
	Croatia	379	64	6.5	4	26	59.7	45.4	0.4	35.7	3	2	1.6	15.9257	25.4302	17.6125	81.2336	0.23
	Italy	547	62	14.6	31	60	64.4	34.5	58.7	27.3	67	97	11.6	13.0188	26.3709	82.4813	17.7544	0.48
	Cyprus	689	45	3.7	10.7	40	50	27.2	8.4	11.5	0	0	2	0.0654378	55.0111	0.732719	89.2747	0
2010	Latvia	324	74	3.6	9.4	39	48.9	24	29.9	14.5	2	95	0.7	66.5693	112.915	171.122	87.6273	0.72
	Lithuania	404	109	7.9	4.9	50	60.4	38.4	46.4	16.6	6	73	3.9	7.06673	61.2084	42.434	140.386	0.65
	Luxembourg	679	38	14	46.5	87	66	31	32.1	33	133	98	24.1	58.1166	0.110672	5651.45	536.563	3.69
	Hungary	403	117	11.6	19.6	36	58.7	32.5	34.2	26	15	61	5.2	0.927136	14.4317	46.656	116.95	0.73
	Malta	601	51	11.7	5.2	23	28.5	22	2.7	13.1	0	16	5.4	1.07748	104.46	1.4891	9.27119	0
	Netherlands	571	68	23	49.2	71	73.9	47.6	32.5	27.8	139	100	25.4	32.1108	360.447	309.194	256.299	0.61
	Austria	562	54	9.4	59.4	60	66.6	34.4	33.7	35.7	182	92	6.3	24.5923	19.5262	297.458	193.381	1.15
	Poland	316	184	10.3	16.3	58	38.9	20.1	21	17.7	5	93	10.8	0.349612	6.44505	23.0245	49.4297	0.87
	Portugal	516	81	7.4	18.7	45	55.5	24.5	66	22.8	38	97	2.2	4.65301	13.4615	89.1286	80.0592	0.24
	Romania	313	188	5.9	12.8	33	43.4	28.2	18.1	12	32	47	2.4	0.479901	107.475	4.81972	18.2256	0.27
	Slovenia	490	105	11.6	22.4	52	61	67.3	15.7	22	11	94	5.9	83.6831	55.1141	380.213	241.628	0
	Slovakia	319	98	9.2	9.1	38	45.7	44.9	8.3	34.9	11	54	5.1	0.614252	5.1322	67.0748	115.742	0
	Finland	470	129	13.1	32.8	33	55.4	26.2	17.8	28.7	62	5	13.5	23.2776	27.6842	132.324	64.1598	2.36
	Sweden	439	50	9.2	48.1	51	69.2	32.4	167.2	55.3	60	78	7.4	86.8305	89.929	103.805	121.204	0.15
	United Kingdom	509	57	18.3	40.2	60	60.7	24.1	75.4	26.9	76	96	14.6	2.03529	161.111	8.30736	58.9366	0.35
	Belgium	445	95	22.6	53.4	63	80.3	41.5	66.1	32	93	18	16.6	15.5731	337.321	570.382	259.014	0.59
	Bulgaria	460	460	14	25	14	66.5	40.7	53.1	62.4	13	75	1.9	10.6541	102.478	17.1411	13.303	0.07
	Czechia	308	79	8	23.2	58	69.9	58.2	25.7	27.1	8	91	6.3	0.385196	11.2704	73.0655	263.174	0.81
	Denmark	791	40	7.5	42.1	64	61.6	25.9	40.4	46.5	130	91	6.5	14.7356	105.166	68.0125	294.726	0.64
	Germany	619	54	11	65.2	54	71.3	47	30.3	34.8	110	94	10.7	17.2991	51.9422	126.44	147.068	1.03
	Estonia	280	688	31.9	19.1	25	61.3	29.8	59.7	35.9	14	96	19.2	1.16576	372.596	180.903	209.35	0.29
	Ireland	585	46	8.9	36.6	37	74	38.2	82.3	36.1	34	100	1.7	1.4688	85.684	16.7145	117.218	0.31
	Greece	495	119	15.6	17	13	58.6	32.2	41.8	18.6	16	0	1.9	21.145	39.984	33.8902	9.31196	0
	Spain	468	62	15.6	29.8	46	65.5	35.1	57.9	19	48	84	9.8	11.4884	25.8939	116.979	17.0106	0.36
	France	527	48	12.6	37.7	51	64.9	25.1	28.6	22.6	87	66	16.9	5.61932	31.6902	56.977	135.414	0.87
	Croatia	391	60	6.6	14.7	37	59.7	45.4	0.4	35.7	6	51	3.6	15.2752	54.8079	7.96864	98.4711	0.05
	Italy	504	65	18	38.4	64	66.6	37.5	54.2	27.3	73	97	14.5	9.48574	31.8404	97.2524	16.4695	0.53
	Cyprus	657	44	5	13.6	47	55.3	44.8	6.2	12.2	8	60	3.5	0.0298507	62.0913	0.273924	112.541	0
2012	Latvia	323	92	4.6	14.7	58	51.1	24	36.7	26.5	6	95	0.7	176.302	236.002	357.141	44.9553	0.65
	Lithuania	445	96	7.8	23.5	51	62.2	38.9	48.8	41.1	17	88	3.8	14.1731	63.6919	54.4115	163.898	0.61
	Luxembourg	652	31	11.9	47.4	77	62.5	36.7	23.4	27.6	128	99	18.5	76.0687	0.0133588	4993.54	497.615	5.41
	Hungary	402	114	13.1	25.5	35	48.5	27.8	18.1	30.8	18	75	6.1	1.92545	16.1528	51.7635	131.369	0.24
	Malta	590	58	9.1	9.7	29	46.6	32.8	0.8	9.9	12	100	4	0.606715	135.871	1.46763	10.6067	0
	Netherlands	549	67	24.2	49.4	71	69.3	47.7	29.3	33.2	140	100	26.6	35.0698	337.584	304.286	251.027	1.07
	Austria	579	48	8.3	57.7	65	65.9	34.7	21.5	38.2	196	92	7.1	22.9588	10.6632	297.89	198.948	1.04
	Poland	317	183	10.2	12	55	41.4	21.9	28.5	30.4	5	92	10.6	1.4488	10.4764	25.3475	64.4639	1.42
	Portugal	453	73	7.4	26.1	47	56.9	30.4	69.7	24.9	66	97	2.1	12.5717	11.5444	108.105	65.9503	0.29
	Romania	251	178	5.3	14.8	35	56.8	51.3	41.1	14.5	29	67	2.2	2.50533	94.7648	5.9152	18.5681	0.25
	Slovenia	362	99	13.7	41.9	74	66.9	64.8	33.1	26.9	21	92	9.4	74.3351	113.324	394.116	251.539	0
	Slovakia	306	96	10.5	13.3	40	68.1	57	36.7	42.6	15	54	4.1	1.38118	6.77162	98.7322	116.777	0.23
	Finland	506	112	11.8	33.3	41	59.3	25.4	16.9	32.8	60	12	15.3	9.34817	25.6873	17.4791	91.9291	1.74
	Sweden	450	48	8.7	47.2	53	69.6	34.9	79.8	62.6	65	81	8.4	69.8354	108.264	96.942	132.222	0.47
	United Kingdom	477	52	17.5	42.6	59	61.4	25.2	51.3	22.5	75	96	14.8	1.54654	164.293	9.50817	50.466	0.41
	Belgium	426	93	23.8	53.6	78	81.3	41.8	72.2	28.4	87	32	18.1	13.7493	334.897	575.884	244.916	0.67
	Bulgaria	442	448	13.2	23.1	17	62	64.1	37.8	68.3	8	75	2.7	10.9122	60.3195	19.1464	11.1498	0.21
	Czechia	310	73	7.3	25.4	60	73	58.2	66.1	29.3	9	90	6.9	0.447135	13.2304	80.7572	268.673	0.81
	Denmark	789	40	8.1	45.1	59	69.8	30.7	52.5	42.3	144	92	9	20.4034	149.625	44.8733	299.435	1.33
	Germany	631	56	11.3	65.6	53	71.4	47.3	26.8	36.9	114	94	10.7	15.9698	42.514	124.969	146.33	0.93
	Estonia	357	722	33.6	31.3	19	60.3	29.3	62	30.4	17	98	11	3.15529	297.736	83.8966	103.704	3.04
	Ireland	562	40	8	39.8	44	68.3	31.3	84.8	43.1	39	100	1.9	2.7552	83.9494	16.8882	118.045	0.6
	Greece	488	113	15.1	15.4	10	53.8	32.8	17.4	29	15	0	1.4	13.5317	32.4486	37.1777	6.29601	0.05
	Spain	448	64	17	30.8	46	68.7	42.5	64.3	26.2	62	70	7.7	22.8585	24.6955	126.297	22.0498	0.44
	France	519	46	12.3	39.7	53	65.2	25.2	28.2	26.3	91	71	17.8	5.48272	25.1362	55.0634	140.758	1.26
	Croatia	387	70	7.9	16.5	50	52.7	37.7	0.4	35.7	8	69	4.6	21.0017	35.4648	29.9658	88.7096	0
	Italy	488	70	22.7	41.6	67	65.4	38	59	27.3	80	97	16.8	9.35007	26.6525	96.5492	15.8654	0.25
	Cyprus	614	39	5.7	16.8	38	58.7	46.6	11.5	17	21	38	3.1	0.0563425	53.4673	0.277379	65.7075	0
2014	Latvia	364	97	4.8	27	61	54.9	36.4	31.8	26.4	13	92	3.1	29.687	233.248	124.912	52.8408	0
	Lithuania	433	99	7.5	30.5	57	57.7	51.2	27.2	64.6	41	92	3.8	10.0086	136.824	50.6192	113.202	0
	Luxembourg	626	20	7.5	47.7	62	64.9	36.9	31.3	35.4	121	98	11.2	31.6059	0.00179671	4193.26	368.978	12.58
	Hungary	385	114	9.4	30.5	40	52.3	36.8	31.2	47.7	24	86	5.4	2.86616	20.8789	52.7625	115.346	0.26
	Malta	591	53	7.8	7.4	28	41.1	32.9	6.6	11.5	0	100	10.2	0.110121	174.348	0.541028	7.4164	1.73
	Netherlands	527	67	25	50.9	72	70.5	50.6	25.1	38.1	143	100	26.7	36.929	236.821	254.464	258.399	0.99
	Austria	565	51	8.9	56.3	62	66.6	33.6	19.9	39.1	175	94	9.1	24.9847	11.5151	341.823	207.072	1.12
	Poland	272	186	11.5	26.5	60	55.4	28.3	48.6	27.4	15	96	12.5	1.04638	9.90225	35.2305	70.0704	0.75
	Portugal	453	73	8	30.4	53	61	40	131.5	38.2	64	97	2.5	12.6161	10.889	150.323	60.8982	0
	Romania	249	149	4.6	13.1	32	54.8	44.5	26.6	21.3	20	65	1.7	1.10052	60.4112	6.09682	22.2545	0.25
	Slovenia	432	92	12.3	36	75	70.4	69.3	25.9	27.5	30	98	8.4	62.4026	106.895	441.741	284.922	1.29
	Slovakia	320	86	9.3	10.3	40	65.4	55.9	37.2	44.1	17	54	4.8	1.16894	5.7584	69.5336	163.217	0.18
	Finland	482	73	8.1	32.5	41	57.4	24.6	12.8	42.4	70	83	7.3	5.44906	34.0211	28.5454	80.4908	2.39
	Sweden	438	47	8.3	49.9	51	70.5	47.5	22.3	52.7	72	55	6.7	49.3243	96.3076	90.7189	134.157	0.29
	United Kingdom	482	50	16.9	43.7	59	59.2	37.9	31.4	29.6	79	96	15	1.84725	158.949	8.97657	44.9846	0.33
	Belgium	420	98	27.1	53.5	70.6667	81.9	43.4	80.9	34	84	95	20.6	21.1171	305.028	541.905	217.941	0.844375
	Bulgaria	404	420	13	31.8	19.3333	63.8	52.6	39	105.2	37	90	4.3	13.9181	42.1846	14.7842	10.8548	0.122969
	Czechia	339	74	7.8	33.6	56	75.3	59.2	63.9	46.1	23	92	6.16667	0.295588	5.87379	74.1438	257.699	0.658125
	Denmark	777	36	7.2	47.7	59.6667	79	36.1	87.3	41.4	149	90	8.2	18.2645	122.529	22.2343	301.915	0.644219
	Germany	627	54	11.9	66.1	54	70.7	48.4	26	39	113	94	10.8	15.579	38.1787	117.321	141.168	1.08578
	Estonia	376	646	33.8	28.1	22	56	24.6	32.5	75.3	10	97	11.8	3.78056	267.688	68.5953	102.27	0.604687
	Ireland	562	53.3333	9.53333	39.8	39	67	31.2	75	49.5	32	96	1.7	2.11964	80.7724	17.4537	110.355	0.596562
	Greece	498	110.333	14.4667	17.2	13.6667	57.0333	31.7	36.4333	34.2	17	0	2	43.3476	32.1306	37.8264	6.56076	0.033125
	Spain	443	62	17.3	29.7	45.3333	70.3	45.5	67.1	37.4	51	79	8.2	14.4106	28.414	117.213	17.1799	0.411562
	France	511	46	13.5	41.7	51.3333	66	25.8	29.1	37.1	93	72	19.5	4.62708	27.0777	46.1181	123.427	0.810781
	Croatia	403	75	8.2	21	37.6667	54.7	41.1	3	89.2	7	76	4.4	13.2863	23.5044	48.7983	106.001	0.05875
	Italy	497	69	21.5	45.1	63.6667	66.9	42.4	60	27.3	94	98	17.1	7.92625	30.2678	84.9328	18.9805	0.492344
	Cyprus	640	38	5.1	17.2	41.6667	54.6667	39.5333	8.7	13.5667	25	57	2.3	0.113111	53.0163	0.451585	53.0788	0.303594
2016	Latvia	410	97	5.3	25.2	52.6667	57.7	37.2	39.9	23.2	42	98	3.9	6.01426	169.803	73.1503	60.6699	0.532969
	Lithuania	444	102	7.8	48	52.6667	69.5	74.4	48.3	38.9	104	97	4.5	7.6662	175.385	53.2812	74.7209	0.338906
	Luxembourg	614	33	10.5	48.3	75.3333	61.5	32.6	50.6	45.6	121	100	17.9333	18.5455	0.0703259	4100.46	391.36	6.22625
	Hungary	379	98	8.9	34.7	37	49.7	31.4	20.1	53.4	30	99	6.4	3.81417	15.4214	58.979	113.682	0.340313
	Malta	621	66	9.2	7.1	26.6667	38.7333	29.2333	3.36667	11.5	0	100	5.2	0.0873563	154.89	1.54943	3.64598	0.243281
	Netherlands	520	64	26.2	53.1	71.3333	72.6	51.5	51.5	40.4	144	100	29	33.4103	312.729	281.327	218.043	0.8375
	Austria	564	52	9.3	57.6	62.3333	66.8	33.6	17.7	41	181	88	7.5	24.1678	13.4697	314.301	212.941	1.16578
	Poland	307	183	11.8	34.8	57.6667	58	46.9	40.8	38.9	21	91	10.2	2.43381	10.1146	43.1352	59.4	0.85375
	Portugal	474	68	7.8	30.9	48.3333	60.9	41.8	103.4	45.8	79	97	2.1	12.6536	16.9848	145.857	66.2045	0.169688
	Romania	261	140	4.1	13.3	33.3333	51.6667	41.3333	28.6	15.9333	18	85	1.5	0.971651	24.8465	12.5333	21.5098	0.205469
	Slovenia	466	80	11.5	57.7	67	69.4	62	23.5	25.4667	69	98	8.5	54.5908	85.0291	441.212	280.945	0.464062
	Slovakia	348	100	10.9	23	39.3333	65.8	51.7	55.3	50.3	26	54	4.9	1.25953	4.8112	59.3524	176.136	0.122344
	Finland	504	75	8.2	42	38.3333	64.7	25.4	14.4	42.1	65	87	5.3	4.11198	33.4375	18.1309	63.6253	1.79438
	Sweden	443	50	9.4	48.9	51.6667	68.2	50.7	30.9	55.4	72	61	7.1	44.4191	103.097	82.2229	119.748	0.402656
	United Kingdom	483	57	21	44.3	59.3333	64.7	44.9	31	49.8	82	96	17.2	1.25432	183.596	7.57167	41.2	0.347812
